# Supplementary material for: The clinical implications and molecular features of intrahepatic cholangiocarcinoma with perineural invasion
Source: Springer Nature journal article supplement (doi:10.1007/s12072-022-10445-1), 2022-11-22
Supplement: MOESM1 [file 12072_2022_10445_MOESM1_ESM.pdf]

a

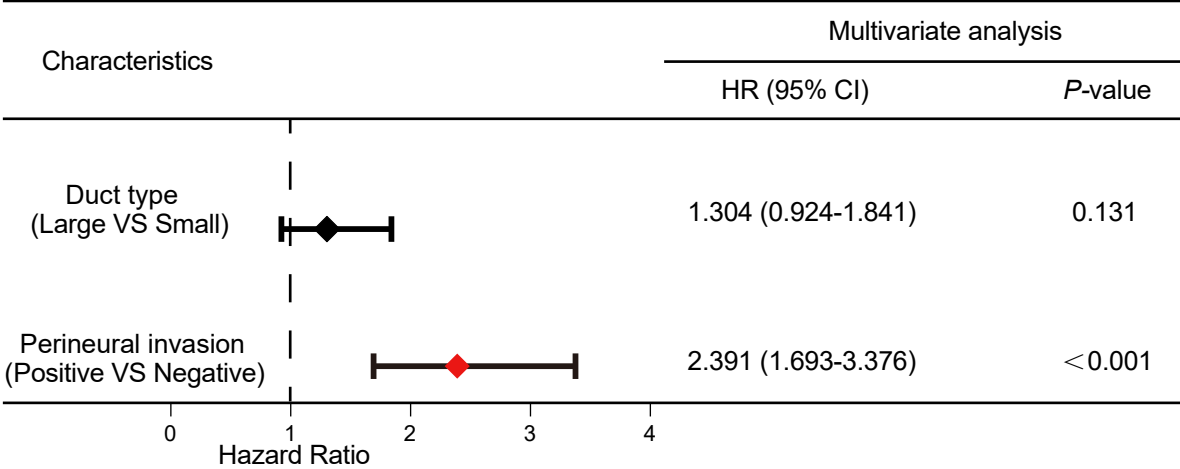

b

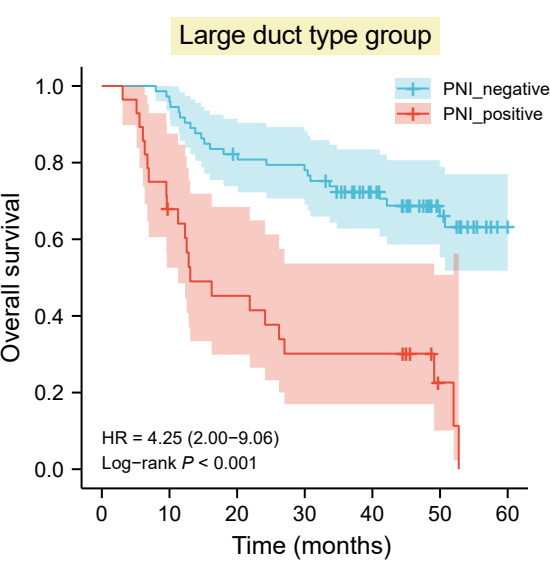

c

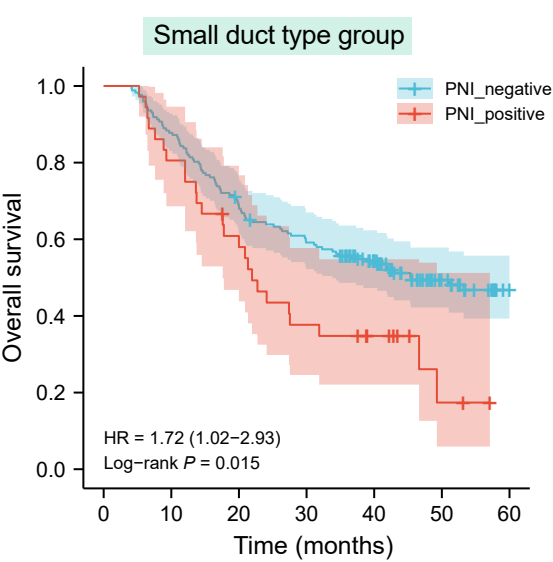

**Supplementary figure1:**

- a. Multivariate analysis of duct type and PNI in TMA cohort.
- b. K-M analysis of OS between patients with PNI and without PNI in the large duct type group of TMA cohort (HR=4.25,  $P < 0.001$ ).
- c. K-M analysis of OS between patients with PNI and without PNI in the small duct type group of TMA cohort (HR=1.72,  $P=0.015$ ).
